# Supplementary material for: Serum Activity of Liver Enzymes Is Associated With Higher Mortality in COVID-19: A Systematic Review and Meta-Analysis
Source: PubMed Central journal article supplement (PMC7387424; doi:10.3389/fmed.2020.00431), 2020-07-22
Supplement: Data_Sheet_1.pdf [file Data_Sheet_1.pdf]

**Supplementary Table 1:** The quality assessment of each included study performed using the Cochrane risk of bias tool.

|               | Random sequence generation (selection bias) | Allocation concealment (selection bias) | Blinding of participants and personnel (performance bias) | Blinding of outcome assessment (detection bias) | Incomplete outcome data (attrition bias) | Selective reporting (reporting bias) | Other bias |
|---------------|---------------------------------------------|-----------------------------------------|-----------------------------------------------------------|-------------------------------------------------|------------------------------------------|--------------------------------------|------------|
| Cai et al     | ?                                           | +                                       | +                                                         | +                                               | +                                        | +                                    | +          |
| Deng et al    | ?                                           | +                                       | +                                                         | +                                               | +                                        | +                                    |            |
| D Wang et al  | +                                           | +                                       | +                                                         | +                                               | +                                        | +                                    | +          |
| Fu et al      | ?                                           | +                                       | +                                                         | +                                               | +                                        | +                                    | +          |
| Huang et al   | +                                           | +                                       | +                                                         | +                                               | +                                        | +                                    | +          |
| L Wang et al  | +                                           | +                                       | +                                                         | +                                               | +                                        | +                                    | +          |
| M Liu et al   | -                                           | +                                       | +                                                         | +                                               | +                                        | +                                    | +          |
| Mo et al      | +                                           | +                                       | +                                                         | +                                               | +                                        | +                                    | +          |
| Qian et al    | ?                                           | +                                       | +                                                         | +                                               | +                                        | +                                    | +          |
| Qu et al      | -                                           | +                                       | +                                                         | +                                               | +                                        | +                                    | +          |
| Ruan et al    | ?                                           | +                                       | +                                                         | +                                               | +                                        | +                                    | +          |
| Tianxin et al | ?                                           | +                                       | +                                                         | +                                               | +                                        | +                                    | +          |
| Wan et al     | ?                                           | +                                       | +                                                         | +                                               | +                                        | +                                    | +          |
| W Liu et al   | +                                           | +                                       | +                                                         | +                                               | +                                        | +                                    | +          |
| Wu et al      | +                                           | +                                       | +                                                         | +                                               | +                                        | +                                    | +          |
| Xu et al      | ?                                           | +                                       | +                                                         | +                                               | +                                        | +                                    | +          |
| Yang et al    | -                                           | +                                       | +                                                         | +                                               | +                                        | +                                    | +          |
| Yudong et al  | +                                           | +                                       | +                                                         | +                                               | +                                        | +                                    | +          |
| Yun et al     | ?                                           | +                                       | +                                                         | +                                               | +                                        | +                                    | +          |
| Zhang et al   | +                                           | +                                       | +                                                         | +                                               | +                                        | +                                    | +          |
| Zhou et al    | +                                           | +                                       | +                                                         | +                                               | +                                        | +                                    | +          |
| Z Wang et al. | +                                           | +                                       | +                                                         | +                                               | +                                        | +                                    | +          |
